# Supplementary material for: Dermoscopy of Small Diameter Melanomas with the Diagnostic Feasibility of Selected Algorithms—A Clinical Retrospective Multicenter Study
Source: MDPI journal article supplement (doi:10.3390/cancers13236095), 2021-12-03
Supplement: s1 [file s1]

# Supplementary Materials: Dermoscopy of Small Diameter Melanomas with the Diagnostic Feasibility of Selected Algorithms—A Clinical Retrospective Multicenter Study

Monika Slowinska, Grazyna Kaminska-Winciorek, Elzbieta Kowalska-Oledzka, Iwona Czarnecka, Robert Czarnecki, Anna Nasierowska-Guttmejer, Elwira Paluchowska and Witold Owczarek

**Table S1.** Review of the literature regarding published studies which included microM cases. Presented data summarize the methodology, results and conclusions of the studies addressing dermoscopic diagnostic of microM [2,3,5–20].

| Study [Ref.]                | microM cases | Diameter cut off [mm]    | TNM Invasiveness                                         | Study group                                                                                                                                                                | Limitation                                                                                                                                                              | Purpose of study/Results / Conclusions                                                                                                                                                                                                                                                                                                                                                                                                                                                                                                                                                                                                          |
|-----------------------------|--------------|--------------------------|----------------------------------------------------------|----------------------------------------------------------------------------------------------------------------------------------------------------------------------------|-------------------------------------------------------------------------------------------------------------------------------------------------------------------------|-------------------------------------------------------------------------------------------------------------------------------------------------------------------------------------------------------------------------------------------------------------------------------------------------------------------------------------------------------------------------------------------------------------------------------------------------------------------------------------------------------------------------------------------------------------------------------------------------------------------------------------------------|
| Bono et al. 1999[1]         | 47           | ≤6 mm (2–6 mm; median 5) | pTis <i>n</i> = 14; pT1 <i>n</i> = 33;                   | microM; no comparator                                                                                                                                                      | Single center<br>No comparator<br>Retrospective analysis<br>No statistical analysis of dermoscopic structures of microM preformed                                       | Purpose of study: frequency of occurrence of microM in clinical context.<br>17% microM of 270 cases of consecutive melanoma 50% (23 lesions) of microM were clinically diagnosed (ABCD rule, positive when fulfilled more than 50% of criteria).36 microM were evaluated dermoscopically and diagnosed in 72% (26 lesions) (positive when 1 criterium was found of: radial streaming, pseudopods, grey-blue veil, whitish veil, black dots et the periphery if network present, thick irregular network, regression, erythema, milky red background with red dots).<br>Combination of clinical and dermoscopic examination revealed 86% microM. |
| Pizzichetta et al. 2001 [2] | 8            | ≤5 mm                    | pTis <i>n</i> = 37; ≥pT1 <i>n</i> = 53;                  | M in situ ( <i>n</i> = 37)<br>(size <5mm <i>n</i> = 8; > 5–10 mm <i>n</i> = 20; > 10 mm ( <i>n</i> = 9) vs. Invasive M ( <i>n</i> = 53)                                    | Multicenter study<br>Retrospective analysis<br>No statistical analysis of dermoscopic structures of microM vs.. >5 mm melanoma preformed<br>Small sample size of microM | Purpose of study: dermoscopic structures of melanomas in situ vs. invasive.<br>Dermoscopic structures chose for evaluation: pigment network alterations, irregular extensions and branched streaks, gray-blue areas, extensions pseudopods, brown globules, black dots, blue-whitish veil, hypopigmentation, white scar-like areas, and linear and dotted vascular patterns.<br>Frequency of features in MpTis: blue-white veil (78%), gray-blue areas (76%), black dots (73%), and irregular extensions and branched streaks (62%) white scar-like areas (0), linear and/or dotted vascular patterns (0).                                      |
| Carli et al. 2003 [3]       | 10           | < 6 mm                   | pTis <i>n</i> = 24; ≥ pT1 <i>n</i> = 40; (median 0.3 mm) | Melanocytic lesions <i>n</i> = 200 divided into groups: - small <6 mm (nevi <i>n</i> = 48, M <i>n</i> = 10), - intermediate 6-9mm (nevi <i>n</i> = 61, M <i>n</i> = 26), - | Single center<br>Retrospective analysis<br>Small sample size of microM<br>No statistical analysis of dermoscopic structures of microM                                   | Purpose of the study: analysis of the melanoma diameter influence on its dermoscopic detection.<br>Diagnostic sensitivity in group <6mm 60% (SD 25.6) vs. 63.7% (SD 28.2) for clinical vs. clinical and dermoscopy.<br>Specificity in group < 6mm 85.4% (SD 8.0) vs. 82.0% (SD 10.0) ) for clinical vs. clinical and dermoscopy.                                                                                                                                                                                                                                                                                                                |

|                                    |    |                                      |                                                                                                        |                                                                                                           |                                                                                                                                                                                               |                                                                                                                                                                                                                                                                                                                                                                                                                                                                                        |
|------------------------------------|----|--------------------------------------|--------------------------------------------------------------------------------------------------------|-----------------------------------------------------------------------------------------------------------|-----------------------------------------------------------------------------------------------------------------------------------------------------------------------------------------------|----------------------------------------------------------------------------------------------------------------------------------------------------------------------------------------------------------------------------------------------------------------------------------------------------------------------------------------------------------------------------------------------------------------------------------------------------------------------------------------|
|                                    |    |                                      |                                                                                                        | large $\geq 10$ mm<br>(nevi $n = 28$ , M<br>$n = 27$ )                                                    |                                                                                                                                                                                               | Diagnostic accuracy in group $< 6$ mm 80.6%<br>(SD 6.4) and 78.8% (SD 10.1) ) for clinical vs.<br>clinical and dermoscopy.                                                                                                                                                                                                                                                                                                                                                             |
| Bono et al.<br>2004<br>[4]         | 22 | $\leq 3$ mm                          |                                                                                                        | microM;<br>no comparator                                                                                  | Single center<br>No comparator<br>Retrospective analysis<br>No statistical<br>analysis of dermo-<br>scopic structures of<br>microM preformed                                                  | Purpose of the study: to assess the clinical<br>and dermoscopic features of microM<br>of 3 mm.<br>MicroM are dark, black macule, even color,<br>with well-defined borders; asymmetric or<br>symmetric in shape.<br>Sensitivity of clinical examination 50%;<br>dermoscopic -100%.                                                                                                                                                                                                      |
| Fernandez et<br>al.<br>2004<br>[5] | 94 | $\leq 6$ mm                          | Median<br>thickness:<br>0.29 mm in<br>small M<br>group;<br>0.4 mm in $>$<br>6 mm                       | $> 6$ mm M                                                                                                | Single center<br>Retrospective analysis of pathological<br>reports<br>No statistical<br>analysis of dermo-<br>scopic structures of<br>microM preformed                                        | Purpose of the study: frequency of microM<br>based on analysis of pathological reports.<br>38.21% melanomas $\leq 6$ mm<br>microM average age 52.45 years vs. $> 6$ mm<br>M 59.16 years ( $p < 0.002$ ), microM less inva-<br>sive (0.29–0.4 mm, $p < 0.02$ ).                                                                                                                                                                                                                         |
| Helsing et al.<br>2004<br>[6]      | 18 | $< 7$ mm<br>(3–6 mm;<br>mean 4.6)    | pTis $n = 47$ ;<br>pT1 $n = 56$ ;<br>$> pT1$ $n = 55$ ;<br>median<br>thickness in<br>small M<br>0.8 mm | $> 7$ mm $n = 140$                                                                                        | The Norwegian Mel-<br>anoma Project 1990-<br>1993<br>Retrospective<br>analysis of the<br>medical registry<br>No statistical<br>analysis of dermo-<br>scopic structures of<br>microM preformed | Purpose of the study: assess the frequency<br>and prognosis of melanomas $< 7$ mm.<br>The frequency of microM 11.4%.<br>Diagnostic sensitivity for microM 44%.                                                                                                                                                                                                                                                                                                                         |
| Bono et al.<br>2006<br>[7]         | 23 | $\leq 3$ mm<br>(1–3 mm;<br>median 2) | pTis $n = 4$ ;<br>pT1 $n = 19$ ;                                                                       | microM;<br>no comparator                                                                                  | Single center<br>Prospective study<br>No comparator<br>No statistical<br>analysis of dermo-<br>scopic structures of<br>microM preformed                                                       | Purpose of the study: to analyze the<br>sensitivity and specificity of clinical and<br>dermoscopic examinations microM $\leq 3$ mm.<br>Clinical diagnosis - based on the subjective<br>experience of the single clinician vs. dermo-<br>scopic criteria for melanoma – Menzies’<br>method.<br>Sensitivity: dermoscopy (Menzies’ method)<br>vs. clinical examination 83% vs. 43%<br>( $p < 0.01$ ).<br>Specificity 69% Menzies’ method vs. 91%<br>clinical examination ( $p < 0.001$ ). |
| Friedman et<br>al.<br>2008<br>[8]  | 49 | $\leq 6$ mm                          | pTis $n = 28$ ;<br>$\geq pT1$ $n = 21$ ;                                                               | Pigmented skin<br>lesions; $n = 941$<br>Cases from the<br>commercial<br>digital dermo-<br>scopic database | Blinded comparison<br>study<br>No statistical<br>analysis of dermo-<br>scopic structures of<br>microM preformed                                                                               | Purpose of the study: to assess the diagnos-<br>tic sensitivity of dermoscopists vs.<br>an automatic multispectral computer-vision<br>system in diagnosing pigmented skin<br>lesions $< 6$ mm.<br>The prevalence of small MM 25%.<br>microM average sensitivity 40% (median<br>43%); average specificity 80% (median 84%).<br>MicroM pTis sensitivity 33%,<br>microM invasive 48% (thickness<br>0.1–1.4 mm; median 0.32 mm).                                                           |
| Abbasi et al.<br>2008<br>[9]       | 35 | $\leq 6$ mm<br>(2–6 mm)              | pTis $n = 84$<br>(1.5%<br>$< 6$ mm);                                                                   | Pigmented le-<br>sions $< /> 6$ mm<br>Total $n = 1657$ ;                                                  | Cohort study<br>Prospective analysis                                                                                                                                                          | Purpose of the study: to assess the influence<br>of the M diameter $< /> 6$ mm on clinical diag-<br>nosis based on ABCD rule.                                                                                                                                                                                                                                                                                                                                                          |

|                                     |          |                                            |                                                                                    |                                       |                                                                                  |                                                                                                                                                                                                                                                                                                                                                                                                                                                                                                                                                                                                                                                                                                                                                                                                                                                                                         |
|-------------------------------------|----------|--------------------------------------------|------------------------------------------------------------------------------------|---------------------------------------|----------------------------------------------------------------------------------|-----------------------------------------------------------------------------------------------------------------------------------------------------------------------------------------------------------------------------------------------------------------------------------------------------------------------------------------------------------------------------------------------------------------------------------------------------------------------------------------------------------------------------------------------------------------------------------------------------------------------------------------------------------------------------------------------------------------------------------------------------------------------------------------------------------------------------------------------------------------------------------------|
|                                     |          |                                            | ≥pT1 n = 54<br>(2.6%<br><6 mm);                                                    | n = 804 <6mm                          | No statistical<br>analysis of dermo-<br>scopic structures of<br>microM preformed | Frequency of microM<6mm 4.1%.<br>Diagnostic sensitivity: 5 mm – 83%; 6 mm -<br>75%; 7 mm - 63%) - decreases with increase<br>of the diameter of lesions.<br>Diagnostic specificity: 5 mm – 38%,<br>6 mm – 54%, 7 mm - 65%) - increases with<br>the diameter.<br>The study supported importance of D –<br>criterion >6mm of ABCDE rule in early M<br>diagnosis.                                                                                                                                                                                                                                                                                                                                                                                                                                                                                                                          |
| De Giorgi et<br>al. 2012<br>[10]    | 34       | <6 mm<br>(3–6mm)                           | pTis n = 18;<br>pT1 n = 15<br>>pT1 n = 1;                                          | microM;<br>Melanocytic<br>nevi n = 69 | Single center<br>Retrospective analy-<br>sis                                     | Purpose of the study: to analyze the clinical<br>and dermatoscopic features of small<br>(<6mm) pigmented melanocytic lesions.<br>Clinical criteria – ABCD rule<br>vs. dermoscopic pattern analysis.<br>Dermoscopic structures: atypical pigment<br>network, irregular dots, irregular streaks,<br>irregular globules, irregular diffuse pigmen-<br>tation, regression structures, atypical vascu-<br>lar pattern, blue-white vel- all frequency<br>differences were $p < 0.05$ with exclusion of<br>irregular dots.<br>Dermoscopic pattern: reticular 17.7% vs.<br>33.3%, globular 2.9% vs. 14.5%, starburst<br>2.9% vs. 4.4%, homogenous 0 vs. 9%,<br>unspecific 76.5% vs. 39.1% ( $p < 0.001$ ).<br>The clinical criteria for diagnosing mela-<br>noma are not as reliable in the diagnosis of<br>pigmented lesions of less than<br>6 mm diameter in comparison to the<br>dermoscopy. |
| Pupelli et al.<br>2013<br>[11]      | 24       | ≤5 mm<br>(2–5 mm)                          | pTis n = 11<br>pT1 n = 10<br>>pT1 n = 3                                            | Melanocytic<br>nevi ≤5 mm n =<br>72   | Two center<br>Prospective analysis                                               | Purpose of study: analysis of morphological<br>differences in reflectance confocal micros-<br>copy (RCM) structures between the mela-<br>noma and melanocytic naevi ≤5 mm.<br>Dermoscopic criteria of the 7-point checklist<br>vs. RCM criteria<br>Combination of dermoscopic and confocal<br>structures reduced the false positive<br>diagnoses of melanoma.<br>Dermoscopic structures of microM vs. nevi<br>with $p < 0.05$ : atypical vessels, irregular pig-<br>mentation, irregular dots/globules, periph-<br>eral streaks, regression.<br>The 7-point checklist score ≥3 in 22/24 (92%)<br>microM, no statistically significant differ-<br>ence to nevi (46%)                                                                                                                                                                                                                     |
| Seidenari et<br>al.<br>2014<br>[12] | 22<br>57 | ≤4 mm<br>(2.4–4 mm;<br>mean 3.4)<br>4–6 mm | pTis n = 135<br>(n = 10 for<br>microM);<br>>pT1 n = 347<br>(n = 12 for<br>microM); | MM>4 mm;<br>n = 460                   | Two center<br>Retrospective analy-<br>sis                                        | Purpose of the study: comparison of the<br>dermoscopic features of MMs <4 mm<br>and >4mm<br>Dermoscopic patterns of 22 microM ≤4<br>mm:<br>multicomponent 32%, bicomponent 27%,<br>spitzoid 18%, reticular 14%, globular and is-<br>land 5%.<br>Dermoscopic features of 22 microM ≤4<br>mm: atypical network 77%, irregular                                                                                                                                                                                                                                                                                                                                                                                                                                                                                                                                                             |

|                           |    |                                                                                                                                                 |                                                                                                             |                                                                                                                    |                                                                                                                                                                                       |                                                                                                                                                                                                                                                                                                                                                                                                                                                                                                                                                                                                                                                                                                                                                                                                                                      |
|---------------------------|----|-------------------------------------------------------------------------------------------------------------------------------------------------|-------------------------------------------------------------------------------------------------------------|--------------------------------------------------------------------------------------------------------------------|---------------------------------------------------------------------------------------------------------------------------------------------------------------------------------------|--------------------------------------------------------------------------------------------------------------------------------------------------------------------------------------------------------------------------------------------------------------------------------------------------------------------------------------------------------------------------------------------------------------------------------------------------------------------------------------------------------------------------------------------------------------------------------------------------------------------------------------------------------------------------------------------------------------------------------------------------------------------------------------------------------------------------------------|
|                           |    |                                                                                                                                                 |                                                                                                             |                                                                                                                    |                                                                                                                                                                                       | <p>dots/globules 55%, irregular streaks 36%, regression 32%, irregular pigmentation 32%, atypical vessels and blue-white veil 5%, asymmetry 36%.</p> <p>Score of 7-point mean 3.5 (SD 1.41) in <math>\leq 4</math> mm microM and mean 3.84 (SD 1.65) in 4–6 mm melanomas were significantly lower than in larger melanomas.</p> <p>The statistically significant differences between <math>&lt; 6</math> mm vs. <math>&gt; 6</math> mm melanomas were found for: asymmetry, number of colors, atypical vessels, irregular globules/dots and regression.</p>                                                                                                                                                                                                                                                                          |
| Emiroglu et al. 2014 [13] | 29 | $< 6$ mm                                                                                                                                        | <p>pTis <math>n = 13</math>;<br/>pT1 <math>n = 58</math>;<br/><math>&gt; pT1</math> <math>n = 13</math></p> | <p>M <math>&gt; 6</math> mm <math>n = 42</math>;<br/>location restricted to trunk;</p>                             | <p>Multicenter Retrospective analysis<br/>Location of melanoma restricted to trunk</p>                                                                                                | <p>Purpose of the study: frequency of dermoscopic features in trunk melanomas <math>&lt; /&gt; 6</math> mm pTis vs. invasive.</p> <p>Dermoscopic melanoma-specific features in microM: asymmetry (79.3%), blotches (79.3%), variety of colors (72.4%), atypical dots and globules (72.4%) atypical pigment network (69.0%), blue-grey veil (65.5%, <math>p &lt; 0.05</math>), multicomponent structure (58.6%, <math>p &lt; 0.05</math>), streaks (58.6%), regression structures (48.3%, <math>p &lt; 0.05</math>), milky red areas (24.1%, <math>p &lt; 0.05</math>), atypical vessels (13.8%).</p> <p>No correlations between dermoscopic features and melanoma invasiveness were found.</p>                                                                                                                                       |
| Salerni et al. 2015 [14]  | 8  | $< 5$ mm (2.5–4.5 mm; mean of 3.7).                                                                                                             | <p>pTis <math>n = 6</math>;<br/>pT1 <math>n = 2</math>;</p>                                                 | <p>M restricted to lower limbs;<br/>No comparator</p>                                                              | <p>Single center Retrospective analysis<br/>Small sample size of microM<br/>No comparator<br/>Location of melanoma on lower limbs<br/>Type: Case series</p>                           | <p>Purpose of the study: dermoscopic features of microM on lower limbs. Dermoscopy evaluation by the pattern analysis: 7/8 reticular pattern and atypical network; 5/8 asymmetry; 3/8 radial streaks/pseudopods; 3/8 only 1 color, 2/8 2 colors, 3/8 <math>&gt; 2</math> colors among microM.</p>                                                                                                                                                                                                                                                                                                                                                                                                                                                                                                                                    |
| Dika et al. 2017 [15]     | 62 | <p><math>&lt; 6</math> mm<br/><math>n = 31</math><br/>86.11% of DDM</p> <p><math>n = 31</math><br/>58.49% of EM<br/>(<math>p = 0.01</math>)</p> | <p>Total number of patients<br/>pTis <math>n = 22</math> (75% DDM);<br/>pT1 <math>n = 67</math> ();</p>     | <p>Difficult to diagnose M (DDM) <math>&lt; /&gt; 6</math> mm vs. evident M (EM) <math>&lt; /&gt; 6</math> mm;</p> | <p>Single center Retrospective analysis<br/>Location of melanoma on lower limbs<br/>Lack of results of dermoscopic analysis regarding microM <math>&lt; 6</math> mm in DDM and EM</p> | <p>Purpose of the study: dermoscopic differentiation between melanoma simulating melanocytic nevi (difficult-to-diagnose; DDM) and evident melanomas (EM).</p> <p>DDM features: depigmentation as only specific criterion, risk factor correlated with DDM – M pTis (adj. OR 12.61; 95 % CI 1.92–82.65) and M <math>&lt; 0.4</math> mm thickness (adj. OR 8.58; 95 % CI 1.27–58.00).</p> <p>The melanoma diameter (<math>&gt; 6</math> mm vs. <math>&lt; 6</math> mm) was statistically not significant in the multivariate analysis.</p> <p>Dermoscopic features differences DDM vs. EM with <math>p &lt; 0.05</math>: multicomponent pattern 0% vs. 15%, depigmentation 47.2% vs. 15%, scar-like depigmentation 0% vs. 18.9%, multiple color 0% vs. 45.3%, veil 8.3% vs. 30.2%, lack of melanoma-specific criteria 43% vs. 3%.</p> |

|                                    |               |                                                                      |                                                                                                           |                                                                                                                               |                                                                                                                                                                                                                  |                                                                                                                                                                                                                                                                                                                                                                                                                                                                                                                                                                                                                                                                                                                                                                                                                                                                                                                                                                                                             |
|------------------------------------|---------------|----------------------------------------------------------------------|-----------------------------------------------------------------------------------------------------------|-------------------------------------------------------------------------------------------------------------------------------|------------------------------------------------------------------------------------------------------------------------------------------------------------------------------------------------------------------|-------------------------------------------------------------------------------------------------------------------------------------------------------------------------------------------------------------------------------------------------------------------------------------------------------------------------------------------------------------------------------------------------------------------------------------------------------------------------------------------------------------------------------------------------------------------------------------------------------------------------------------------------------------------------------------------------------------------------------------------------------------------------------------------------------------------------------------------------------------------------------------------------------------------------------------------------------------------------------------------------------------|
|                                    |               |                                                                      |                                                                                                           |                                                                                                                               | The diagnostic sensitivity of the dermoscopic algorithms in M below $\leq 1\text{mm}$ thickness:<br>- pattern analysis 64.05%,<br>- the 7-point checklist 61.08%,<br>- Menzies' method 57.30%,<br>- ABCD 42.70%. |                                                                                                                                                                                                                                                                                                                                                                                                                                                                                                                                                                                                                                                                                                                                                                                                                                                                                                                                                                                                             |
| Drugge et al. 2018 [16]            | 19<br>9<br>27 | $\leq 2\text{mm}$<br>2 - $\leq 3\text{mm}$<br>>3 - $\leq 6\text{mm}$ | pTis $n = 50$ ;<br>$\geq \text{pT1}$ $n = 31$ ;                                                           | Melanocytic lesions $n = 268$ ;<br>M $n = 81$                                                                                 | Single center<br>Retrospective analysis<br>No statistical analysis of dermoscopic structures preformed<br>Type: Letter to editor                                                                                 | Purpose of the study: report of frequency of microM detected based on comparison of total body photography sets and dermoscopy in follow-up of patients.<br>Number needed to excise 3.1 M vs. 12.01 nevi.<br>Comparison of complete sets of TBP images with dermoscopy may reveal microM                                                                                                                                                                                                                                                                                                                                                                                                                                                                                                                                                                                                                                                                                                                    |
| Megaritis et al. 2018 [17]         | 26            | 2–5mm;<br>(mean 3.5mm)                                               | pTis $n = 19$ ;<br>pT1 $n = 7$ ;                                                                          | microM;<br>no comparator                                                                                                      | Single center<br>Retrospective analysis<br>No comparator<br>Small sample size<br>Limited statistical analysis<br>Type: letter to editor                                                                          | Purpose of the study: description of dermoscopic morphology of microM.<br>Dermoscopic pattern: globular 0%, reticular 57.7%, starburst 3.8%, structureless 26.9%, mixed (reticular and globular) 11.5%, multicomponent 0%.<br>Dermoscopic melanoma-specific structures: irregular dots/globules 88.4%, irregular hyperpigmented areas 88.4%, polygons / angulated lines 46.2%, atypical network 42.3%, irregular blotch 38.4%, negative network 11.5%, prominent skin markings 11.5%. regression 7.6%, shiny white structures 3.8%, blue-white veil 3.8%.                                                                                                                                                                                                                                                                                                                                                                                                                                                   |
| Campos-do-Carmo G et al. 2021 [28] | 123           | 1–6 mm;<br>48.2% up to 3 mm<br>91.5% up to 5 mm                      | pTis $n = 69$ ;<br>pT1 $n = 27$ ;<br>atypical melanocytic proliferations/incipient melanomas;<br>$n = 27$ | 481 melanocytic lesion $\leq 6\text{mm}$ located on trunk and limb;<br>358 melanocytic nevi $\leq 6\text{mm}$ as a comparator | Two center<br>Prospective analysis<br>Location of melanoma restricted to trunk and limbs                                                                                                                         | Purpose of the study: evaluate clinical and dermatoscopic features in suspicious pigmented cutaneous lesions $\leq 6\text{mm}$ and to calculate their diagnostic feasibility.<br>The independent variables for microM <6mm, adjusted for age, gender and location: streaks (adjusted Odds Ratio [aOR] 2.5; 95% CI 1.3–4.7; $p = 0.006$ ), and structureless area (aOR 2.2, 95% CI 1.2–4.0, $p = 0.011$ ). The symmetric typical pigment network was a protection variable (aOR 0.4, 95% 0.7–0.9, $p = 0.040$ ).<br>The clinical diagnosis of microM (ABCDE rule) in 33.5% of the lesions (36.6% sensitivity, 67.6% specificity). The dermatoscopic diagnosis of microM in 90.0% of lesions (92.7% sensitivity, 11.2% specificity, 81.6% NPV). 29.3% of confirmed melanomas had both a clinical and dermatoscopic diagnosis of melanoma.<br>The modified ABC-point list algorithm (Blum, Rassner and Garbe ; 2003): score $\geq 4$ in 54.3% of microM (sensitivity 61.8, specificity 48.3%, accuracy 51.8%). |

**Abbreviations and acronyms used in supplementary table:**

|         |                                                                                                                                       |
|---------|---------------------------------------------------------------------------------------------------------------------------------------|
| microM  | micromelanoma                                                                                                                         |
| M       | melanoma                                                                                                                              |
| TNM     | T (tumour), N (node), M (metastasis)                                                                                                  |
| SD      | standard deviation                                                                                                                    |
| DDM     | difficult-to-diagnose melanoma                                                                                                        |
| EM      | evident melanoma                                                                                                                      |
| CI      | confidence interval                                                                                                                   |
| TBP     | total body photography                                                                                                                |
| NPV     | negative predicted value                                                                                                              |
| OR      | odds ratio                                                                                                                            |
| TDS     | total dermoscopy score of the dermoscopic ABCD rule of Stolz                                                                          |
| ABC     | Modified ABC-point list of dermoscopy (algorithm) by Blum et al.                                                                      |
| ABCD    | the dermoscopic ABCD rule of Stolz (algorithm)                                                                                        |
| ABCDE   | asymmetry (A), borders (B), colors (C), diameter >6 mm (D), evolution (E) – the clinical rule to diagnose melanoma by Friedman et al. |
| TADA    | Triage Amalgamated Dermoscopic Algorithm by Rogers et al.                                                                             |
| 7-point | 7-point checklist of dermoscopy by Argenziano et al.                                                                                  |
| Vs.     | versus                                                                                                                                |

**References**

- Bono, A.; Bartoli, C.; Moglia, D.; Maurichi, A.; Camerini, T.; Grassi, G.; Tragni, G.; Cascinelli, N. Small melanomas: A clinical study on 270 consecutive cases of cutaneous melanoma. *Melanoma Res.* **1999**, *9*, 583–586.
- Pizzichetta, M.A.; Argenziano, G.; Talamini, R.; Piccolo, D.; Gatti, A.; Trevisan, G.; Sasso, G.; Veronesi, A.; Carbone, A.; Soyer, H.P. Dermoscopic criteria for melanoma in situ are similar to those for early invasive melanoma. *Cancer* **2001**, *91*, 992–997. [https://doi.org/10.1002/1097-0142\(20010301\)91:5<992::AID-CNCR1089>3.0.CO;2-I](https://doi.org/10.1002/1097-0142(20010301)91:5<992::AID-CNCR1089>3.0.CO;2-I).
- Carli, P.; De Giorgi, V.; Chiarugi, A.; Nardini, P.; Mannone, F.; Stante, M.; Quercioli, E.; Sestini, S.; Giannotti, B. Effect of lesion size on the diagnostic performance of dermoscopy in melanoma detection. *Dermatology* **2003**, *206*, 292–296. <https://doi.org/10.1159/000069939>.
- Bono, A.; Bartoli, C.; Baldi, M.; Moglia, D.; Tomatis, S.; Tragni, G.; Cascinelli, N.; Santinami, M. Micro-melanoma detection. A clinical study on 22 cases of melanoma with a diameter equal to or less than 3 mm. *Tumori* **2004**, *90*, 128–131.
- Fernandez, E.M.; Helm, K.F. The diameter of melanomas. *Dermatol. Surg.* **2004**, *30*, 1219–1222. <https://doi.org/10.1111/j.1524-4725.2004.30379.x>.
- Helsing, P.; Loeb, M. Small Diameter Melanoma: A Follow-Up of the Norwegian Melanoma Project. *Br. J. Dermatol.* **2004**, *151*, 1081–1083. <https://doi.org/10.1111/j.1365-2133.2004.06248.x>.
- Bono, A.; Tolomio, E.; Trincione, S.; Bartoli, C.; Tomatis, S.; Carbone, A.; Santinami, M. Micro-melanoma detection: A clinical study on 206 consecutive cases of pigmented skin lesions with a diameter < or = 3 mm. *Br. J. Dermatol.* **2006**, *155*, 570–573. <https://doi.org/10.1111/j.1365-2133.2006.07396.x>.
- Friedman, R.J.; Gutkowitz-Krusin, D.; Farber, M.J. The Diagnostic Performance of Expert Dermoscopists vs. a Computer-Vision System on Small-Diameter Melanomas. *Arch. Dermatol.* **2008**, *144*, 476–482. <https://doi.org/10.1001/archderm.144.4.476>.
- Abbasi, N.R.; Yancovitz, M.; Gutkowitz-Krusin, D.; Panageas, K.S.; Mihm, M.C.; Googe, P.; King, R.; Prieto, V.; Osman, I.; Friedman, R.J.; et al. Utility of lesion diameter in the clinical diagnosis of cutaneous melanoma. *Arch. Dermatol.* **2008**, *144*, 469–474. <https://doi.org/10.1001/archderm.144.4.469>.
- de Giorgi, V.; Savarese, I.; Rossari, S.; Gori, A.; Grazzini, M.; Crocetti, E.; Sara Longo, A.; Oranges, T.; Massi, D. Features of small melanocytic lesions: Does small mean benign? A clinical-dermoscopic study. *Melanoma Res.* **2012**, *22*, 252–256. <https://doi.org/10.1097/CMR.0b013e3283527430>.
- Pupelli, G.; Longo, C.; Veneziano, L.; Cesinaro, A.M.; Ferrara, G.; Piana, S.; Moscarella, E.; Ricci, C.; Zalaudek, I.; Seidenari, S.; et al. Small-diameter melanocytic lesions: Morphological analysis by means of in vivo confocal microscopy. *Br. J. Dermatol.* **2013**, *168*, 1027–1033. <https://doi.org/10.1155/2014/206260>.
- Seidenari, S.; Ferrari, C.; Borsari, S.; Fabiano, A.; Bassoli, S.; Giusti, F.; Ponti, G.; Magnoni, C. Dermoscopy of small melanomas: Just miniaturized dermoscopy? *Br. J. Dermatol.* **2014**, *171*, 1006–1013. <https://doi.org/10.1111/bjd.12542>.
- Emiroglu, N.; Pelin Cengiz, F.; Hofmann-Wellenhof, R. Dermoscopic and clinical features of trunk melanomas. *Postępy Dermatologii Alergologii* **2014**, *31*, 362–367. <https://doi.org/10.5114/pdia.2014.47119>.
- Salerni, G.; Alonso, C.; Fernández-Bussy, R. A series of small-diameter melanomas on the legs: Dermoscopic clues for early recognition. *Dermatol. Pract. Concept.* **2015**, *5*, 8. <https://doi.org/10.5826/dpc.0504a08>.
- Dika, E.; Chessa, M.A.; Ribero, S.; Fanti, P.A.; Gurioli, C.; Lambertini, M.; Baraldi, C.; Patrizi, A. Diagnostic Efficacy of Digital Dermoscopy and Clinical Findings in Thin Melanoma of the Lower Limbs. *Acta Derm. Venereol.* **2017**, *97*, 1100–1107. <https://doi.org/10.2340/00015555-2705>.

16. Drugge, E.D.; Volpicelli, E.R.; Sarac, R.M.; Strang, S.R.; Elston, D.M.; Drugge, R.J. Micromelanomas identified with time-lapse total body photography and dermoscopy. *J. Am. Acad. Dermatol.* **2018**, *78*, 182–183. <https://doi.org/10.1016/j.jaad.2017.07.049>.
17. Megaris, A.; Lallas, A.; Bagolini, L.P.; Balais, G.; Cuevas, R.G.; Lallas, K.; Gkentsidi, T.; Manoli, S.M.; Papageorgiou, C.; Spyridis, I. et al. Dermatoscopic features of melanomas with a diameter up to 5mm (micro-melanomas): A retrospective study. *J. Am. Acad. Dermatol.* **2020**, *83*, 1160–1161. <https://doi.org/10.1016/j.jaad.2020.04.006>.
18. Campos-do-Carmo, G.; Nobre, A.B.; Cuzzi, T.; Argenziano, G.; Ferreira, C.G.; Thuler, L.C.S. Melanocytic lesions  $\leq$  6mm: Prospective series of 481 melanocytic trunk and limb lesions in Brazil. *PLoS ONE* **2021**, *16*, e0252162. <https://doi.org/10.1371/journal.pone.0252162>.
